# Supplementary material
Source: publisher figshare collection journal article supplement (https://geolsoc.figshare.com/ndownloader/files/20546985)
Supplement: Supplementary file 1 [file 20546985]

**Supplementary Item 1**. Well IRE 5/22-1 “Errigal Deepwater Exploration” Final Well Report. Volume 1: Geological and Petrophysical Evaluation. Republic of Ireland Continental Shelf Oil Well Records. Prepared by Toby Lenehan. Published in 2001. Report provided by the Petroleum Affairs Division (PAD). Curated by IHS Energy. Available for download from: <https://www.dccae.gov.ie/en-ie/natural-resources/topics/Oil-Gas-Exploration-Production/data/Pages/Data.aspx>.

**Supplementary Item 2**. Wellsite litholog for ERRIGAL IRE 5/22-1. Wellsite geologists: James Hollands and Alastair Flood. Provided by the Petroleum Affairs Division (PAD). Available for download from: <https://www.dccae.gov.ie/en-ie/natural-resources/topics/Oil-Gas-Exploration-Production/data/Pages/Data.aspx>.

**Supplementary Item 3**. Evidence for the conditions of cementation and petroleum emplacement from fluid inclusions, Eastern Rockall Basin, Eire. Republic of Ireland Continental Shelf Oil Well Records. Prepared by Fluid Inclusion Analyses (FIA). Report provided by the Petroleum Affairs Division (PAD). Curated by IHS Energy. Available for download from: <https://www.dccae.gov.ie/en-ie/natural-resources/topics/Oil-Gas-Exploration-Production/data/Pages/Data.aspx>.

**Supplementary Item 4**. Thermal history reconstruction in Errigal deepwater exploration well 5/22-1, using AFTA and vitrinite reflectance. Republic of Ireland Continental Shelf Oil Well Records. Published in 2001. Geotrack report #807. Prepared by P.F.Green (Geotrack). Report provided by the Petroleum Affairs Division (PAD). Curated by IHS Energy. Available for download from: <https://www.dccae.gov.ie/en-ie/natural-resources/topics/Oil-Gas-Exploration-Production/data/Pages/Data.aspx>.

**Supplementary Item 5**. IRE 12/2-1 Dooish composite log. Wellsite geologists: Peter Geerlings and Nick O’Neill. Log compiled by Peter Geerlings and Toby Lenehan. Report provided by the Petroleum Affairs Division (PAD). Available for download from: <https://www.dccae.gov.ie/en-ie/natural-resources/topics/Oil-Gas-Exploration-Production/data/Pages/Data.aspx>.

**Supplementary Item 6**. Geochemical report on well 5/22-1. Republic of Ireland Continental Shelf Oil Well Records. Published in 2001. Authored by Peter B. Hall (GeoLab Nor A/S). Report provided by the Petroleum Affairs Division (PAD). Curated by IHS Energy. Available for download from: <https://www.dccae.gov.ie/en-ie/natural-resources/topics/Oil-Gas-Exploration-Production/data/Pages/Data.aspx>.
